# Supplementary material for: Daily Vigorous Intensity Physical Activity and Its Preventive Effect on Pancreatic Cancer
Source: PubMed Central journal article supplement — Cancer Res Treat. 2021 Sep 27;54(3):873–81. doi: 10.4143/crt.2021.400 (PMC9296946; doi:10.4143/crt.2021.400), 2021-09-27
Supplement: crt-2021-400-suppl1.pdf [file crt-2021-400-suppl1.pdf]

**S1 Table.** Hazard ratios and 95% confidence intervals for the incidence of pancreatic cancer according to the four groups divided by the frequency of vigorous physical activity in subjects excluding cases developing pancreatic cancer within 6 months from the date of cohort participation (n=220,335)

| Physical activity | Person-year | Incidence cases | Incidence density | Hazard ratios (95% confidence interval) |                  |
|-------------------|-------------|-----------------|-------------------|-----------------------------------------|------------------|
|                   |             |                 |                   | Unadjusted                              | Adjusted model   |
| Group 1           | 566,483.5   | 228             | 4.0               | 1.00 (reference)                        | 1.00 (reference) |
| Group 2           | 291,640.2   | 101             | 3.5               | 0.86 (0.68-1.09)                        | 1.12 (0.87-1.44) |
| Group 3           | 61,965.9    | 16              | 2.6               | 0.64 (0.39-1.07)                        | 0.81 (0.49-1.35) |
| Group 4           | 45,733.7    | 10              | 2.2               | 0.54 (0.29-0.84)                        | 0.51 (0.37-0.96) |
| p for trend       |             |                 |                   | 0.029                                   | 0.009            |
