# Supplementary material for: Daily Vigorous Intensity Physical Activity and Its Preventive Effect on Pancreatic Cancer
Source: PubMed Central journal article supplement — Cancer Res Treat. 2021 Sep 27;54(3):873–81. doi: 10.4143/crt.2021.400 (PMC9296946; doi:10.4143/crt.2021.400), 2021-09-27
Supplement: crt-2021-400-suppl2.pdf [file crt-2021-400-suppl2.pdf]

**S2 Table.** Hazard ratios and 95% confidence intervals for the incidence of pancreatic cancer according to the quartile groups of MET

| MET (min/wk)               | Person-year | Incidence cases | Incidence density | Hazard ratios (95% confidence interval) |                  |
|----------------------------|-------------|-----------------|-------------------|-----------------------------------------|------------------|
|                            |             |                 |                   | Unadjusted                              | Adjusted model   |
| Quartile 1 ( $\leq 863$ )  | 512,367.4   | 228             | 4.1               | 1.00 (reference)                        | 1.00 (reference) |
| Quartile 2 (864-1194)      | 312,418.9   | 109             | 3.6               | 0.94 (0.71-1.09)                        | 1.14 (0.82-1.39) |
| Quartile 3 (1195-1307)     | 72,244.7    | 25              | 2.7               | 0.78 (0.62-0.98)                        | 0.90 (0.73-1.16) |
| Quartile 4 ( $\geq 1308$ ) | 66,284.1    | 15              | 2.3               | 0.71 (0.54-0.91)                        | 0.84 (0.65-1.04) |
| p for trend                |             |                 |                   | 0.010                                   | 0.005            |

MET, metabolic equivalent of task.
